# Supplementary material for: Tryptanthrin inhibits tumor angiogenesis via Notch/Dll4 signaling pathway in zebrafish
Source: PubMed Central journal article supplement — Transl Cancer Res. 2023 Oct 16;12(10):2660–72. doi: 10.21037/tcr-23-925 (PMC10643962; doi:10.21037/tcr-23-925), 2023-10-16
Supplement: tcr-12-10-2660-dss.pdf [file tcr-12-10-2660-dss.pdf]

## Data Sharing Statement

|                     |                                                                                                                                                     |                                                                                                                                                                                                                         |
|---------------------|-----------------------------------------------------------------------------------------------------------------------------------------------------|-------------------------------------------------------------------------------------------------------------------------------------------------------------------------------------------------------------------------|
| <b>Article Info</b> | <a href="https://dx.doi.org/10.21037/tcr-23-925">https://dx.doi.org/10.21037/tcr-23-925</a>                                                         |                                                                                                                                                                                                                         |
| <b>Item</b>         | <b>Question</b>                                                                                                                                     | <b>Authors' Response<br/>(place "-" if not applicable)</b>                                                                                                                                                              |
| 1                   | Would you like to share data collected for your study to others?                                                                                    | Yes.                                                                                                                                                                                                                    |
| 2                   | If not, would you like to share the reason for your decision?                                                                                       | -                                                                                                                                                                                                                       |
| 3                   | What data in particular will be shared?                                                                                                             | The data about the effect of tryptanthrin on angiogenesis, Dll4 gene regulation in zebrafish, transcriptome sequencing and fluorescence quantitative verification of the Dll4 gene pathway will be shared particularly. |
| 4                   | Any other documents will be shared? Such as study protocol, statistical analysis plan, informed consent form, clinical study report, analytic code. | Study protocol, data analysis and study report will also be shared if requested.                                                                                                                                        |
| 5                   | When will data availability begin?                                                                                                                  | From the publication date.                                                                                                                                                                                              |
| 6                   | When will data availability end?                                                                                                                    | Two years within the publication date, since the technique or data may be updated over time.                                                                                                                            |
| 7                   | To whom will you share the data?                                                                                                                    | Medical oncologists who are interested in studies of tryptanthrin.                                                                                                                                                      |
| 8                   | For what type of analysis or purpose?                                                                                                               | For analysis to explore the antiangiogenesis activities and associated mechanisms of tryptanthrin.                                                                                                                      |
| 9                   | How or where can the data/documents be obtained?                                                                                                    | Emails could be sent to the address below to obtain the shared data:<br><a href="mailto:lmm13645015310@163.com">lmm13645015310@163.com</a> or<br><a href="mailto:saiun1992@163.com">saiun1992@163.com</a> .             |
| 10                  | Any other restrictions?                                                                                                                             | We may balance the potential benefits and risks for each request and then provide the data that could be shared.                                                                                                        |
